# Supplementary material for: Composition and hydrophilicity control of Mn-doped ferrite (MnxFe3−xO4) nanoparticles induced by polyol differentiation
Source: Royal Society of Chemistry journal article supplement (doi:10.1039/c5dt00212e), 2015-01-01
Supplement: c5dt00212e1.pdf [file c5dt00212e1.pdf]

## Composition and hydrophilicity control of Mn-doped ferrite ( $\text{Mn}_x\text{Fe}_{3-x}\text{O}_4$ ) nanoparticles induced by polyol differentiation

Kosmas Vamvakidis,<sup>a</sup> Maria Katsikini,<sup>b</sup> George Vourlias,<sup>b</sup> Mavroeidis Angelakeris,<sup>b</sup> Eleni C. Paloura<sup>b</sup> and Catherine Dendrinou-Samara<sup>a\*</sup>

<sup>a</sup>Department of Chemistry, Aristotle University of Thessaloniki, 54124 Thessaloniki, Greece;

<sup>b</sup>Department of Physics, Aristotle University of Thessaloniki, 54124 Thessaloniki, Greece

\*E-mail: samkat@chem.auth.gr.

### † Electronic supplementary information (ESI)

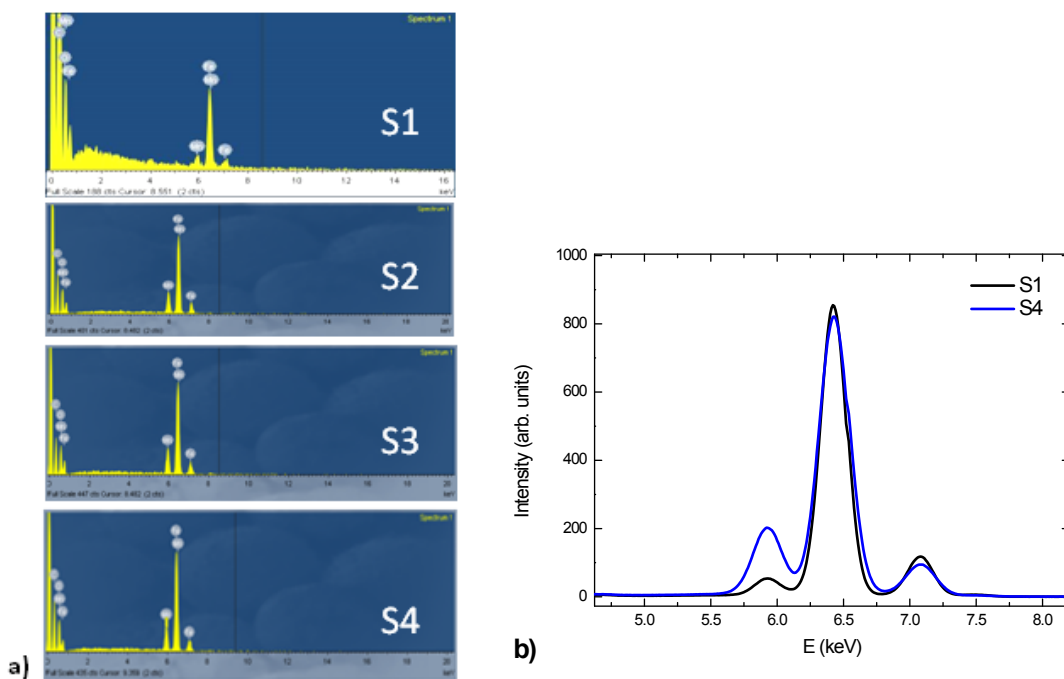

**Figure 1S** EDS spectra of samples S1-S4 (a) and representative XRF spectra of S1 and S4, respectively (b).

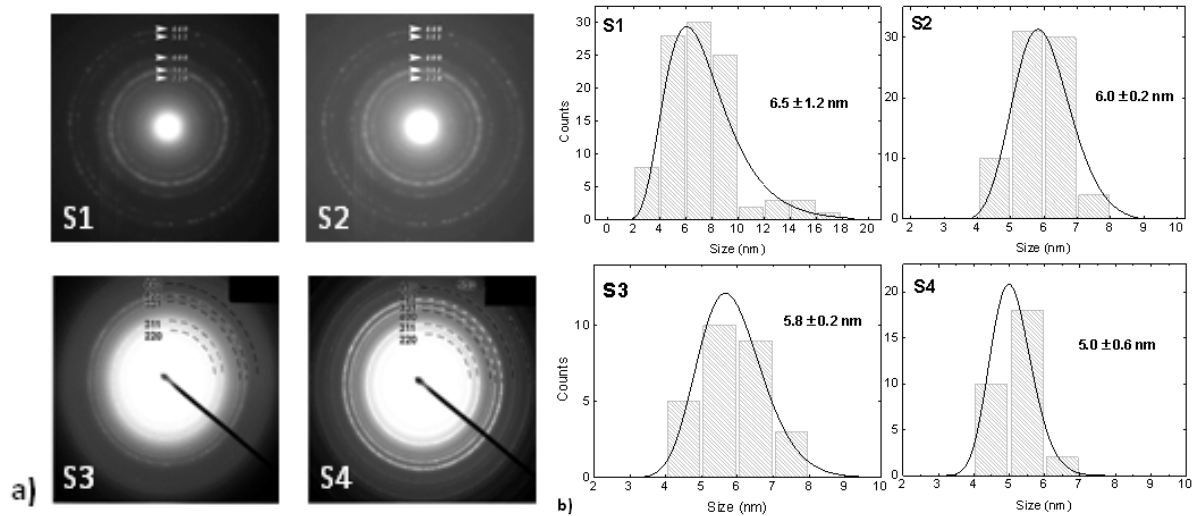

**Figure 2S** Selected area electron diffraction (SAED) patterns of the samples S1-S4 **(a)** and histograms of particle size distributions of the samples fitted with a log-normal function **(b)**.

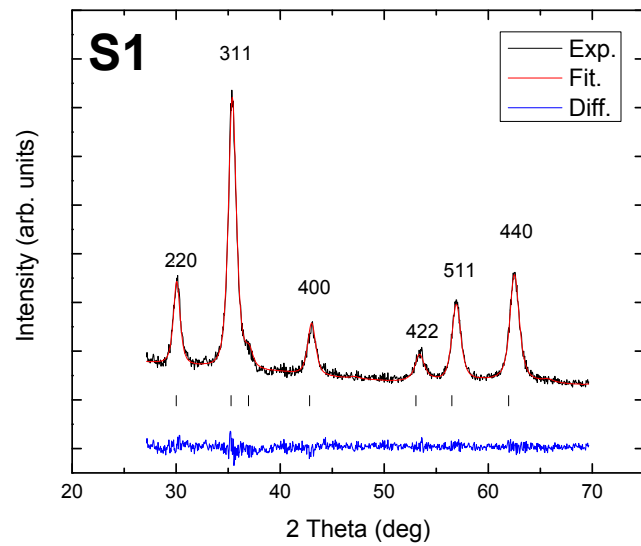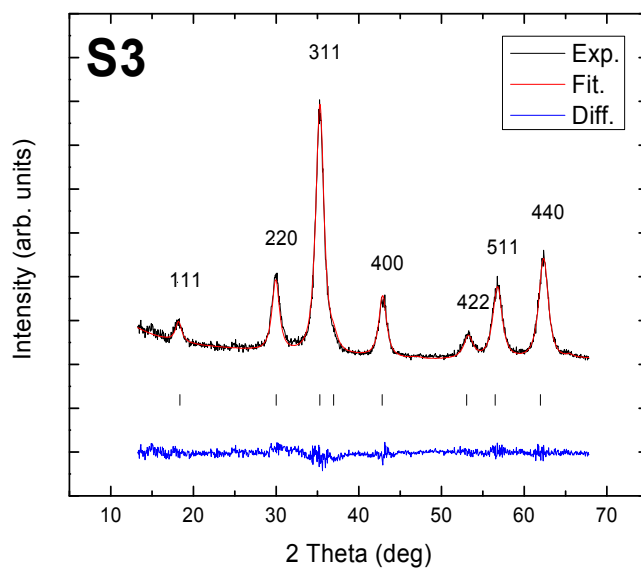

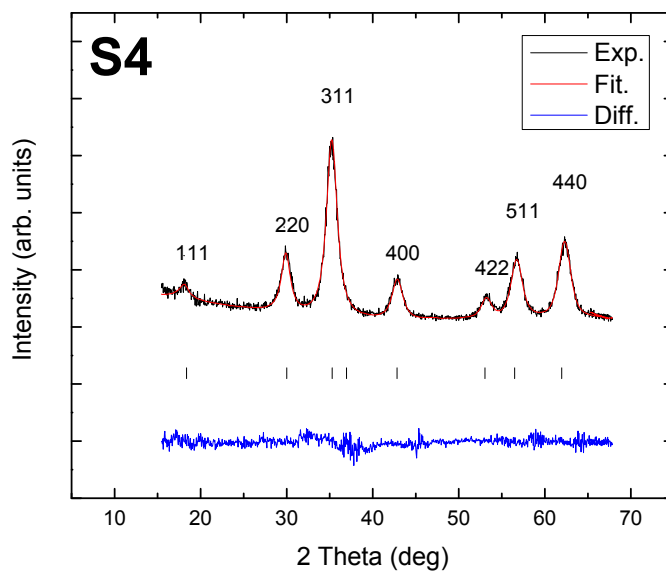

**Figure 3S** Refined spectra of samples S1, S3 and S4 (ICSD 43462).

**Table 1S** Refined parameters and Rietveld agreement factors

|                       | <b>S1</b>  | <b>S2</b>  | <b>S3</b>  | <b>S4</b>  |
|-----------------------|------------|------------|------------|------------|
| $\alpha$ (Å)          | 8.401(3)   | 8.411(6)   | 8.433(2)   | 8.412(1)   |
| $V$ (Å <sup>3</sup> ) | 592.91(57) | 595.03(55) | 599.71(69) | 595.24(77) |
| $d_R$ (nm)            | 7.9(2)     | 6.7(4)     | 6.4(3)     | 4.8(2)     |
| $\chi^2$              | 7.9        | 6.7        | 6.4        | 4.8        |
| $R_p$ (%)             | 4.2        | 1.3        | 1.4        | 1.7        |
| $R_{wp}$ (%)          | 1.91       | 7.84       | 6.89       | 9.6        |

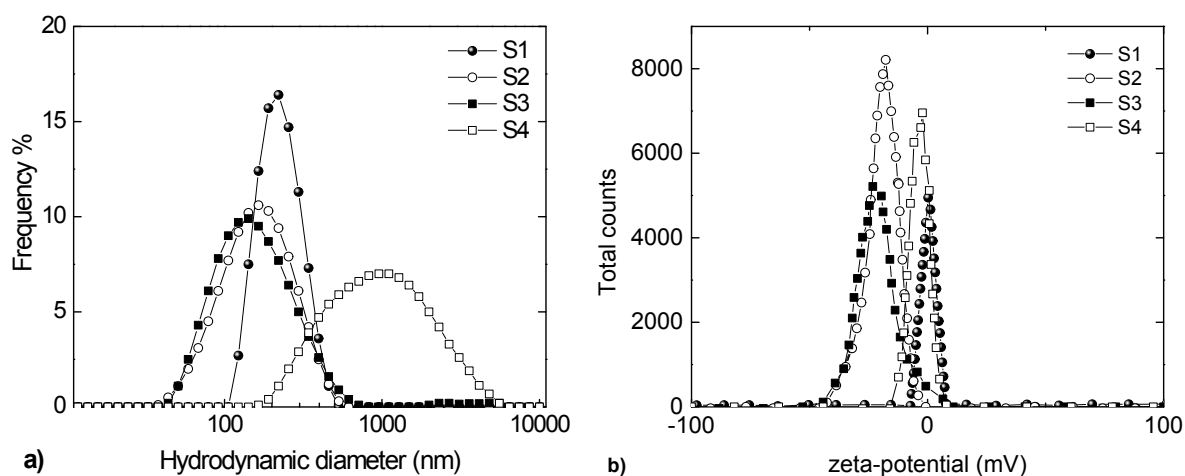

**Figure 4S** Particle size distribution of the samples S1-S4 in water by DLS **(a)** and zeta-potential **(b)** distribution of samples measured in an aqueous medium at 6.8 pH.

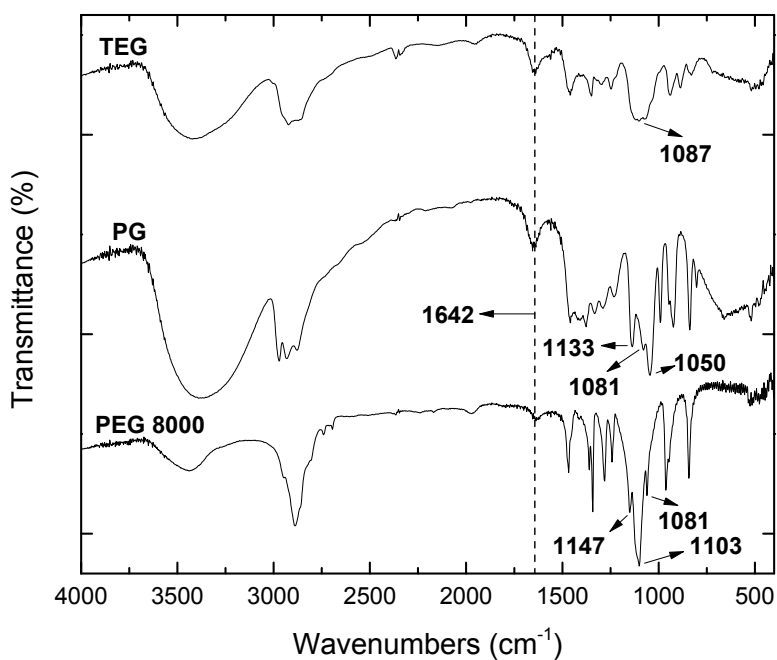

**Figure 5S** FT-IR spectra of the pure surfactants.
